# Supplementary material for: In situ activation of flexible magnetoelectric membrane enhances bone defect repair
Source: PubMed Central journal article supplement (PMC10333320; doi:10.1038/s41467-023-39744-3), 2023-07-10
Supplement: 41467_2023_39744_MOESM1_ESM.pdf [file 41467_2023_39744_MOESM1_ESM.pdf]

## Supplementary Information

### ***In situ* activation of flexible magnetoelectric membrane enhances bone defect repair**

Wenwen Liu<sup>1</sup>, Han Zhao<sup>1</sup>, Chenguang Zhang<sup>2</sup>, Shiqi Xu<sup>3</sup>, Fengyi Zhang<sup>4</sup>, Ling Wei<sup>5</sup>, Fangyu Zhu<sup>1</sup>, Ying Chen<sup>6</sup>, Yumin Chen<sup>1</sup>, Ying Huang<sup>1</sup>, Mingming Xu<sup>1</sup>, Ying He<sup>1</sup>, Boon Chin Heng<sup>7</sup>, Jinxing Zhang<sup>8</sup>, Yang Shen<sup>9</sup>, Xuehui Zhang<sup>10\*</sup>, Houbing Huang<sup>2\*</sup>, Lili Chen<sup>11\*</sup> and Xuliang Deng<sup>1\*</sup>

These authors contributed equally: Wenwen Liu, Han Zhao, Chenguang Zhang.

#### **Affiliations**

<sup>1</sup> Department of Geriatric Dentistry, Peking University School and Hospital of Stomatology, Beijing, P. R. China

<sup>2</sup> Hospital of Stomatology, Guanghua School of Stomatology, Sun Yat-sen University, Guangzhou, P. R. China

<sup>3</sup> School of Materials Science and Engineering & Advanced Research, Institute of Multidisciplinary Science, Beijing Institute of Technology, Beijing, P. R. China

<sup>4</sup> Department of Orthopedics, The Second Xiangya Hospital, Central South University, Changsha, P. R. China

<sup>5</sup> Third Clinical Division, Peking University School and Hospital of Stomatology, Beijing, P. R. China

<sup>6</sup> Department of Prosthodontics, The First Clinical Division, Peking University School and Hospital of Stomatology, Beijing, P. R. China

<sup>7</sup> Central Laboratory, Peking University School and Hospital of Stomatology, Beijing, P. R. China

<sup>8</sup> Department of Physics, Beijing Normal University, Beijing, P. R. China

<sup>9</sup> State Key Laboratory of New Ceramics and Fine Processing Department of Materials Science and Engineering Tsinghua University, Beijing, P. R. China

<sup>10</sup> Department of Dental Materials & Dental Medical Devices Testing Center, Peking University School and Hospital of Stomatology, Beijing 100081, PR China.

<sup>11</sup> Department of Stomatology, Union Hospital, Tongji Medical College, Huazhong University of Science and Technology, Wuhan, P. R. China

#### **Corresponding authors**

Correspondence to Xuehui Zhang, Houbing Huang, Lili Chen, or Xuliang Deng.

\*Emails: zhangxuehui@bjmu.edu.cn; hbhuang@bit.edu.cn; lily-c1030@163.com; kqdengxuliang@bjmu.edu.cn

## **Table of Contents**

|                                        |           |
|----------------------------------------|-----------|
| <b>Supplementary Figure 1-19</b> ..... | <b>3</b>  |
| <b>Supplementary Table 1-2</b> .....   | <b>22</b> |
| <b>Supplementary References</b> .....  | <b>24</b> |

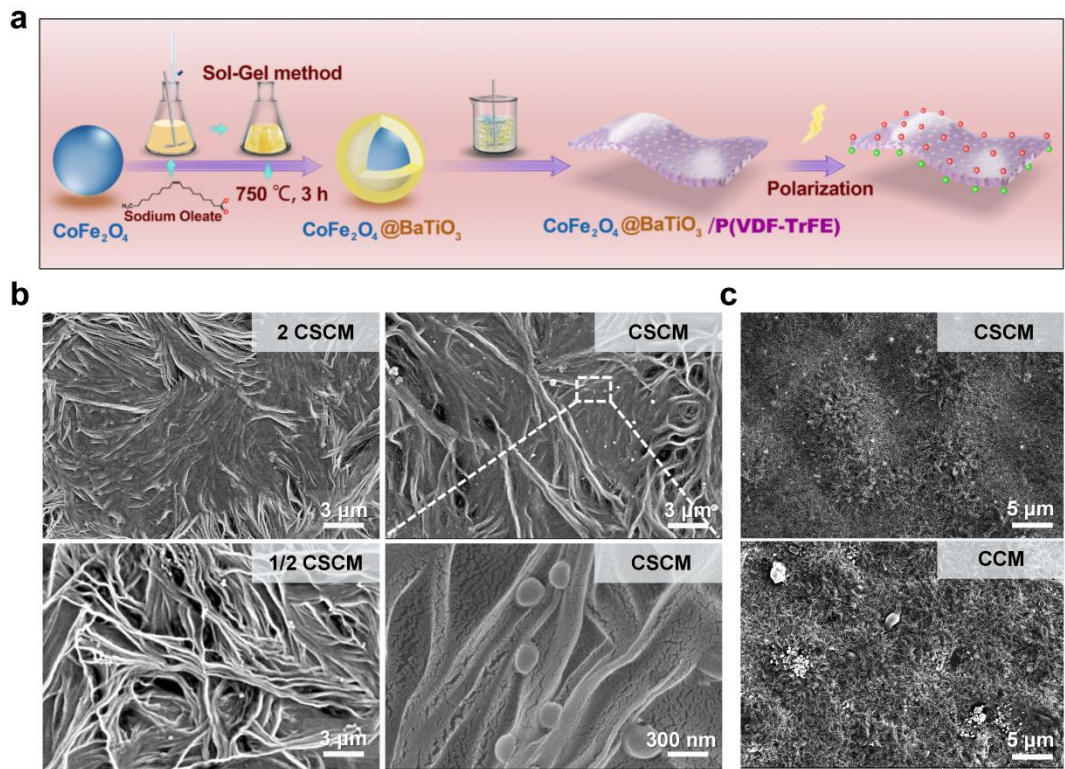

**Supplementary Fig. 1 The fabrication process and characterization of the basic properties of composite membranes.**

**a**, Fabrication process of CFO@BTO core-shell particles and CFO@BTO/P(VDF-TrFE) membrane. **b**, SEM images of 2 CSCM, CSCM and 1/2 CSCM. An enlarged view of the interior of CSCM is shown at the lower right. **c**, SEM images of the surface of CSCM and CCM. At least three times of experiments were repeated independently.

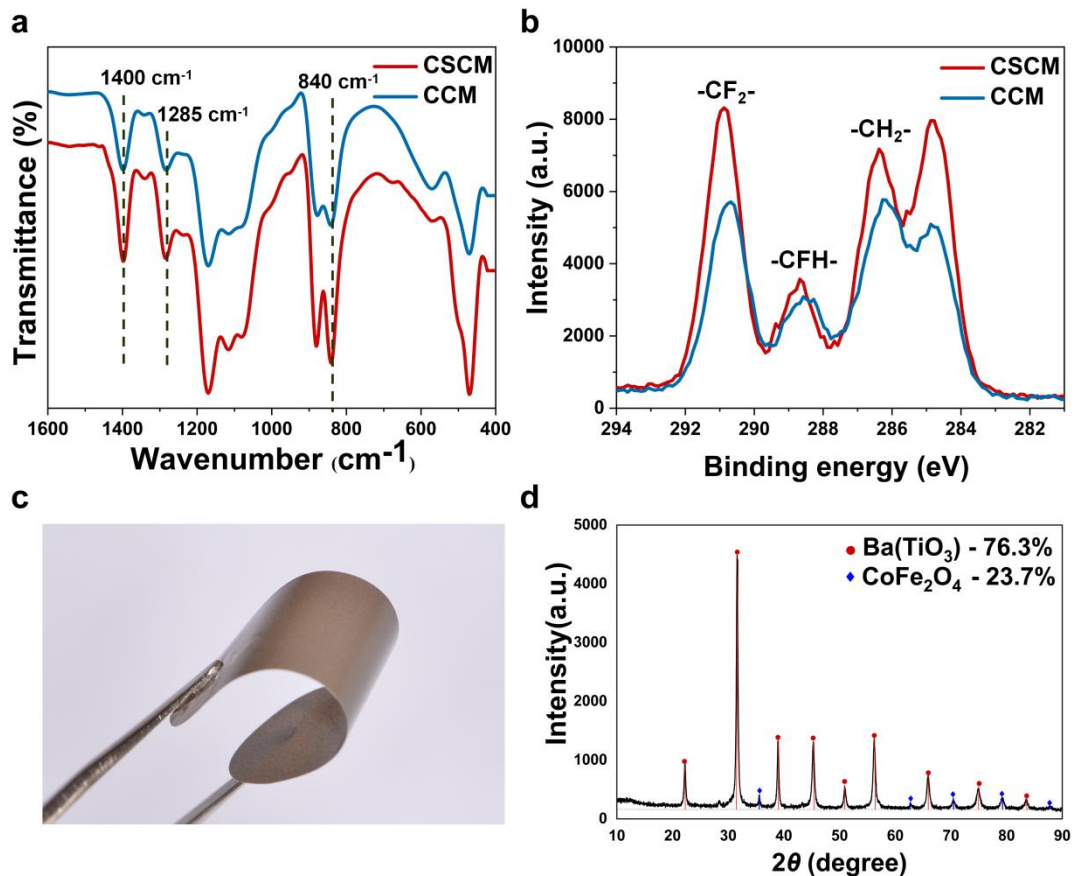

**Supplementary Fig. 2 Characterization of the basic properties of composite membranes.**

**a**, FTIR results of CSCM and CCM. **b**, XPS results for CSCM and CCM. (CSCM represents a composite membrane containing 10% CFO@BTO core-shell particles by weight; 2 CSCM means that the weight content of the core-shell particles is 20%, twice that of CSCM; 1/2 CSCM means 5% core-shell particle weight content, which is half that of CSCM). **c**, Image of CFO@BTO/P(VDF-TrFE) membrane (CSCM). **d**, XRD results of CFO@BTO core-shell. Source data are provided as a Source Data file.

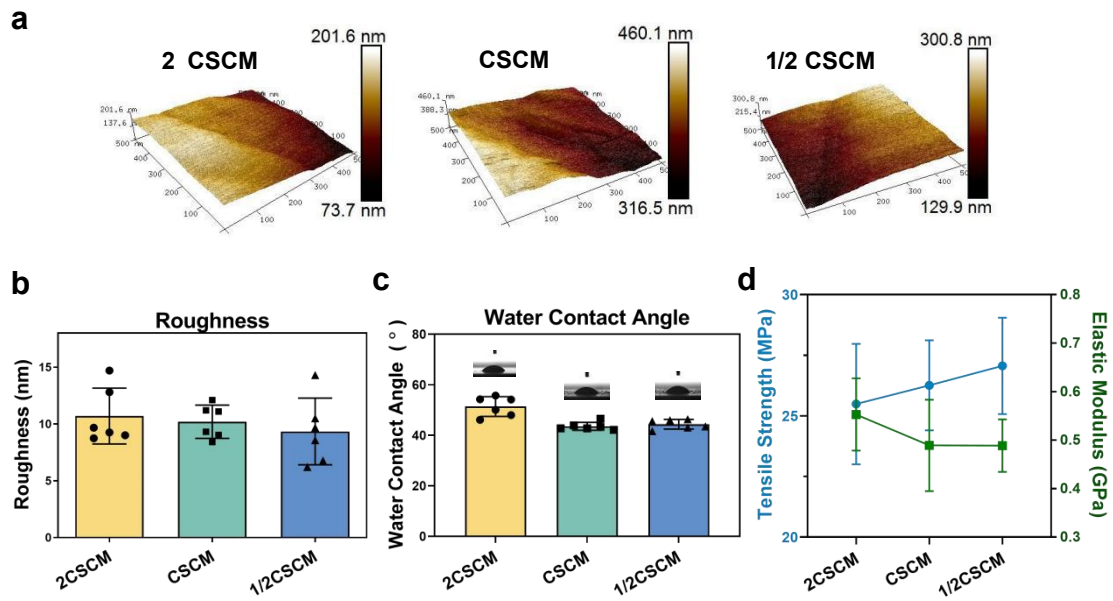

**Supplementary Fig. 3 Surface characteristics and mechanical properties of composite membranes.**

**a**, Surface topography and roughness (**b**) measured by AFM of 2 CSCM, CSCM and 1/2 CSCM. There was no difference in surface roughness between the different membrane groups.  $n=6$  independent membrane samples; mean $\pm$ SEM. **c**, Data statistics and photos of water contact angle, which also showed no significant differences. The contact angle values were  $80^\circ \pm$ , indicating similar hydrophilicity.  $n=6$  independent membrane samples; mean $\pm$ SEM. **d**, Tensile strength and elastic modulus of 2 CSCM, CSCM and 1/2 CSCM.  $n=6$  independent membrane samples; mean $\pm$ SEM. Source data are provided as a Source Data file.

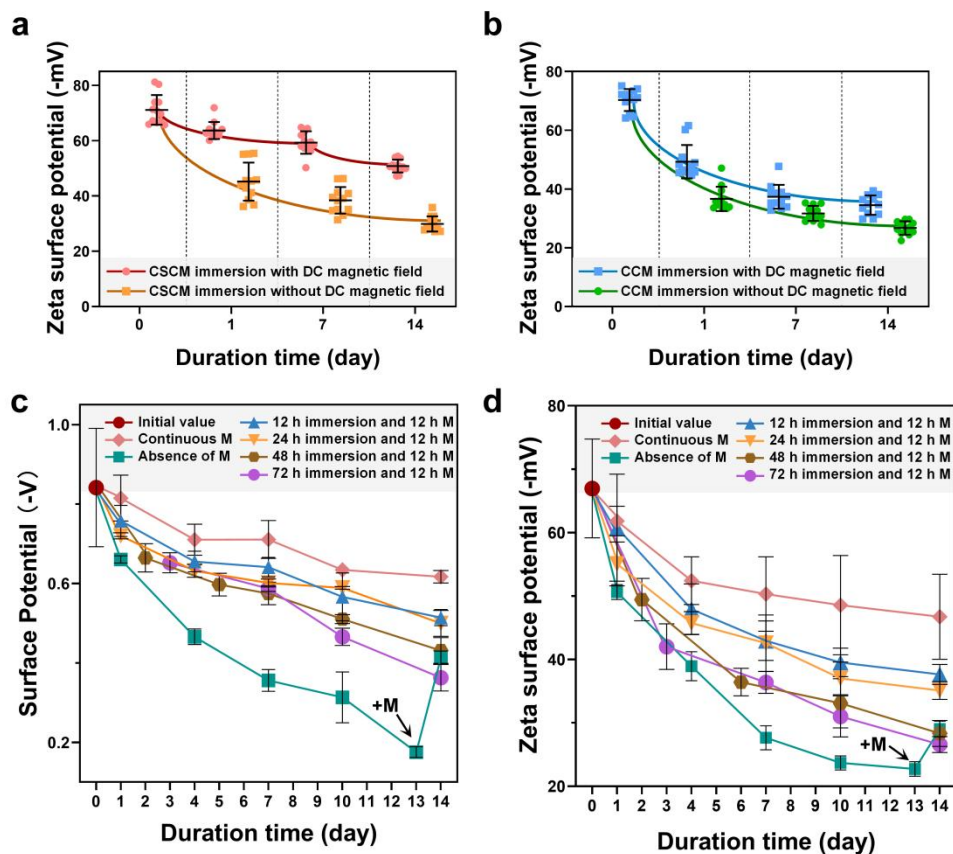

**Supplementary Fig. 4 Characterization of the electrical properties of magnetoelectric composite membranes.**

**a,b**, Zeta potential of CSCM (**a**) and CCM (**b**) immersed in phosphate buffer solution (PBS), with or without exposure to a remote DC magnetic field after 1, 7, 14 days.  $n=12$  membranes for per group and per time point; mean $\pm$ SEM. **c**, Surface potential measured by SKPM and (**d**) zeta potential of CSCM under a continuous magnetic field, 12 h immersion and 12 h magnetic field, 24 h immersion and 12 h magnetic field, 48 h immersion and 12 h magnetic field, 72 h immersion and 12 h magnetic field, and without magnetic field. On the 13<sup>th</sup> day, a magnetic field was applied to the non-magnetic field exposed group, to observe its reactivation effect on the surface potential.  $n=6$  membranes for per group and per time point; mean $\pm$ SEM. Source data are provided as a Source Data file.

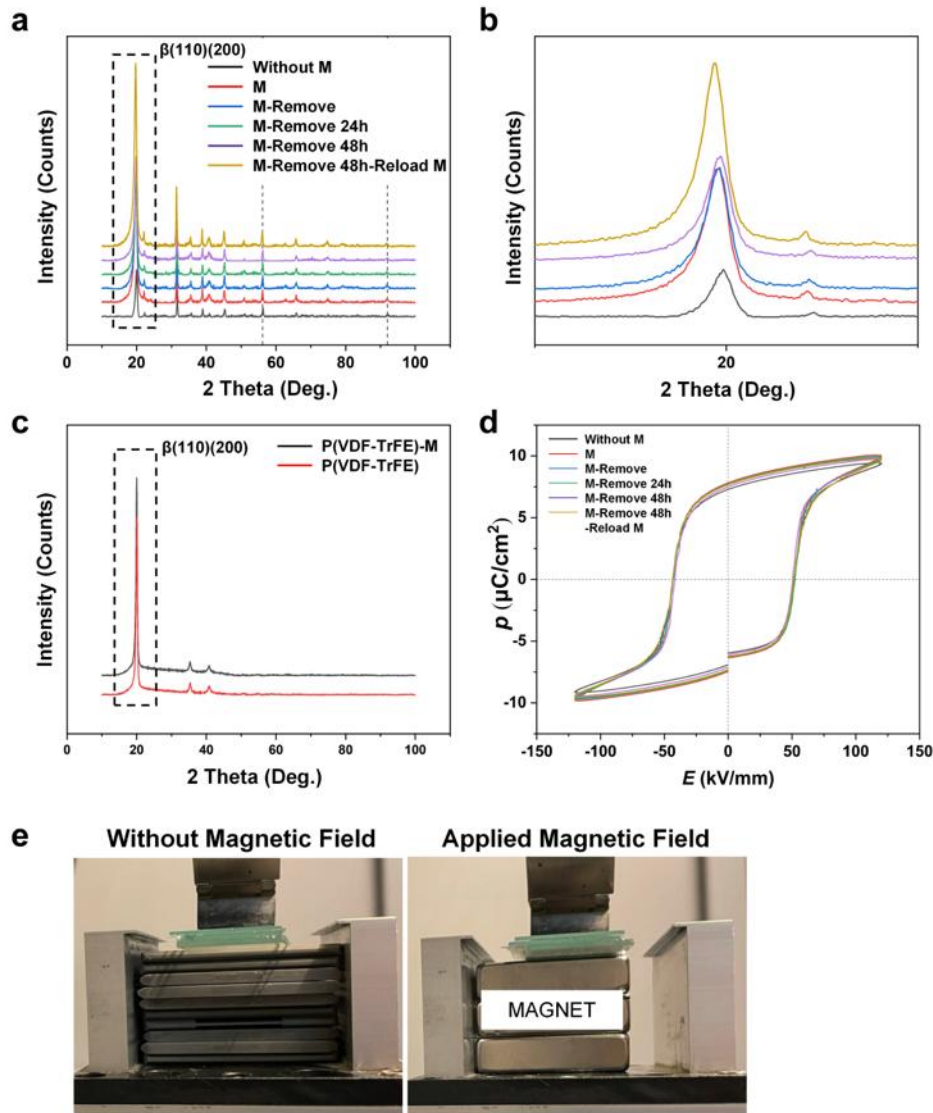

**Supplementary Fig. 5 Phase change detection results and device photos.**

**a**, The XRD results of CSCM under different conditions (without magnetic field, applied magnetic field, magnet removal and 24, 48 h after removing magnet and finally reloading magnetic field). **b**, An enlarged view of figure (a), showing the location of the  $\beta$ -phase. According to Bragg Law  $\lambda=2d \cdot \sin\theta$ , the interplanar crystal spacing of CSCM increased after the magnetic field loading. **c**, The XRD results of P(VDF-TrFE) without magnetic field (black line) and applied magnetic field (red line), which showed no shift of the  $\beta$ -phase position. **d**, The electric hysteresis loop of CSCM under different conditions. **e**, Pictures of the device for XRD detection. Source data are provided as a Source Data file.

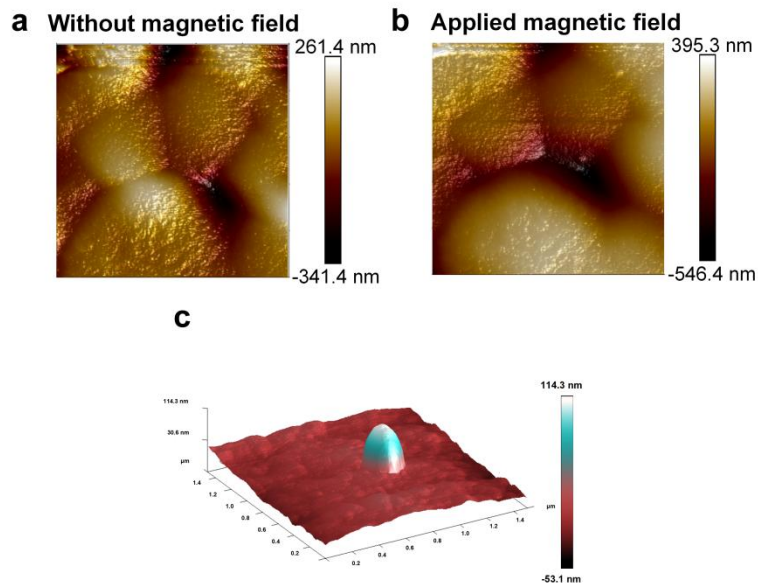

**Supplementary Fig. 6 Morphologies of surface potential and interfacial polarization detection**

**a**, The topography shows the instant change of surface potential before and after applying magnetic field *in situ* (**b**). **c**, 3D topography image of detecting the interface polarization.



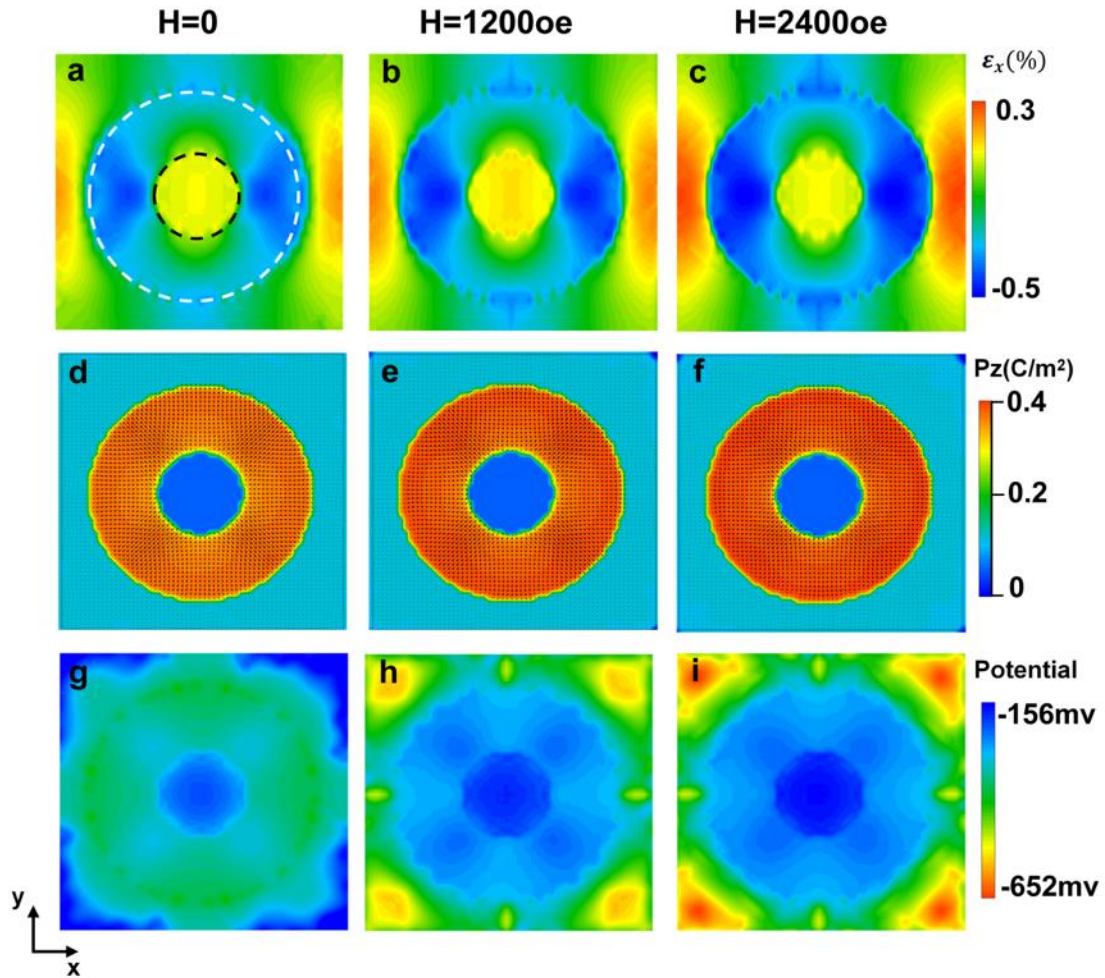

**Supplementary Fig. 7 Phase-field simulation** of the strain distributions along the x-direction under different magnetic fields (a)  $H=0$  (b)  $H=1200$  Oe (c)  $H=2400$  Oe. The polarization component  $P_z$  distributions under different magnetic fields (d)  $H=0$  (e)  $H=1200$  Oe (f)  $H=2400$  Oe. The electrical potential distributions under different magnetic fields (g)  $H=0$  (h)  $H=1200$  Oe (i)  $H=2400$  Oe.

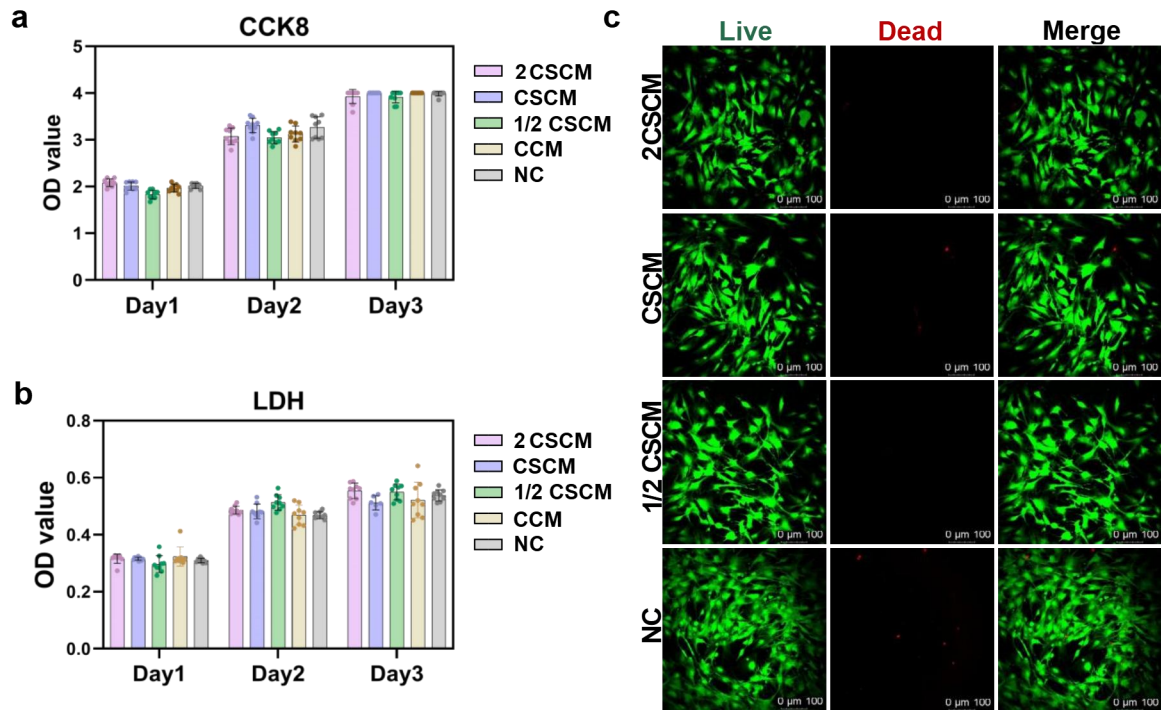

**Supplementary Fig. 8 Biocompatibility of composite membranes in the various groups.**

**a**, Cell proliferation of BM-MSCs cultured on the membranes of various groups by the CCK-8 assay after 1, 2 and 3 days.  $n=9$  biologically independent samples; mean $\pm$ SEM; one-way ANOVA. **b**, The lactate dehydrogenase content in the supernatants of BM-MSCs cultured on the membranes after 1, 2 and 3 days. **c**, Live and dead cell staining on the membranes of different groups.  $n=9$  biologically independent samples; mean $\pm$ SEM; one-way ANOVA. Source data are provided as a Source Data file.

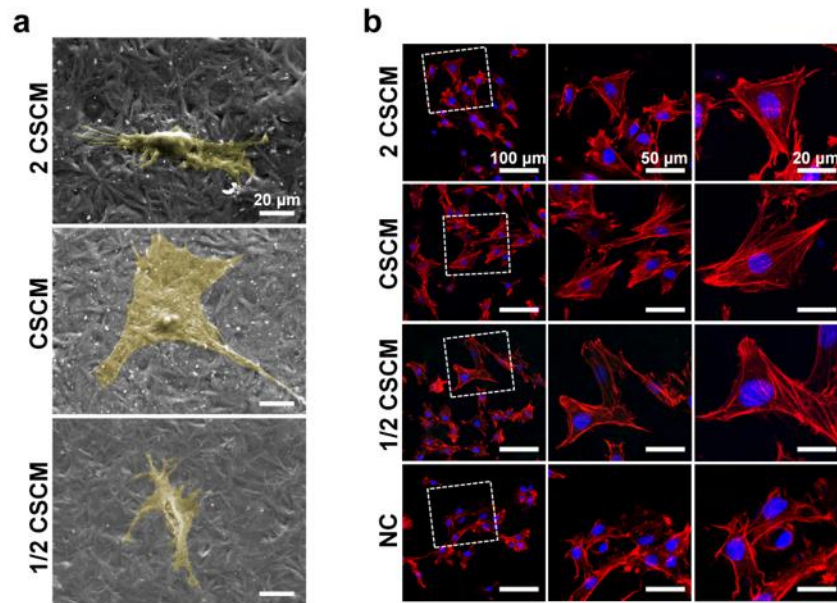

**Supplementary Fig. 9 Characterization of cell spreading on the membrane surfaces.**

**a**, SEM and immunofluorescence images (**b**) of cell spreading on the different membrane groups. At least three times of experiments were repeated independently.

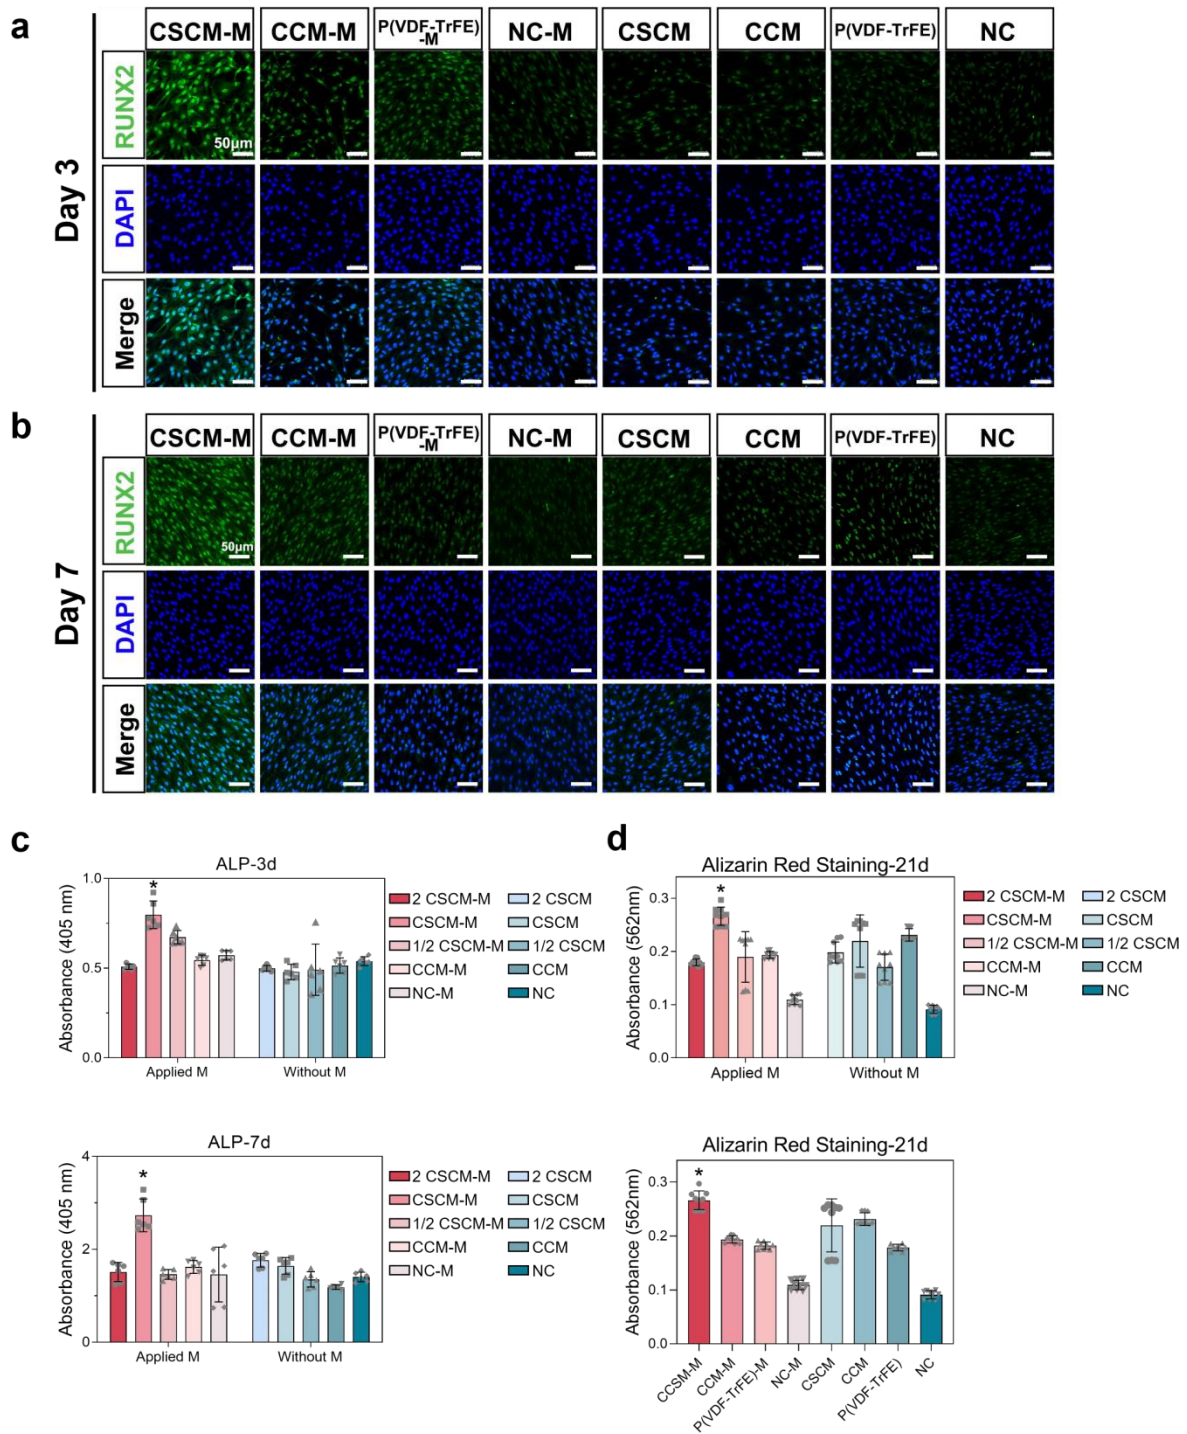

### Supplementary Fig. 10 Osteogenic properties of core-shell magnetoelectric composite membranes

**a,b**, Immunofluorescence images showed the upregulated expression of RUNX2 in the CSCM-M group after 3 and 7 days of cell culture (Scale bars: 50  $\mu$ m). **c**, ALP activity after 3 and 7 days of cell culture.  $n=9$  biologically independent samples; mean $\pm$ SEM. \* $P<0.05$ , one-way ANOVA. **d**, Quantification of Alizarin red staining after 21 days of cell culture.  $n=9$  biologically independent samples; mean $\pm$ SEM. \* $P<0.05$ , one-way ANOVA. Source data are provided as a Source Data file.

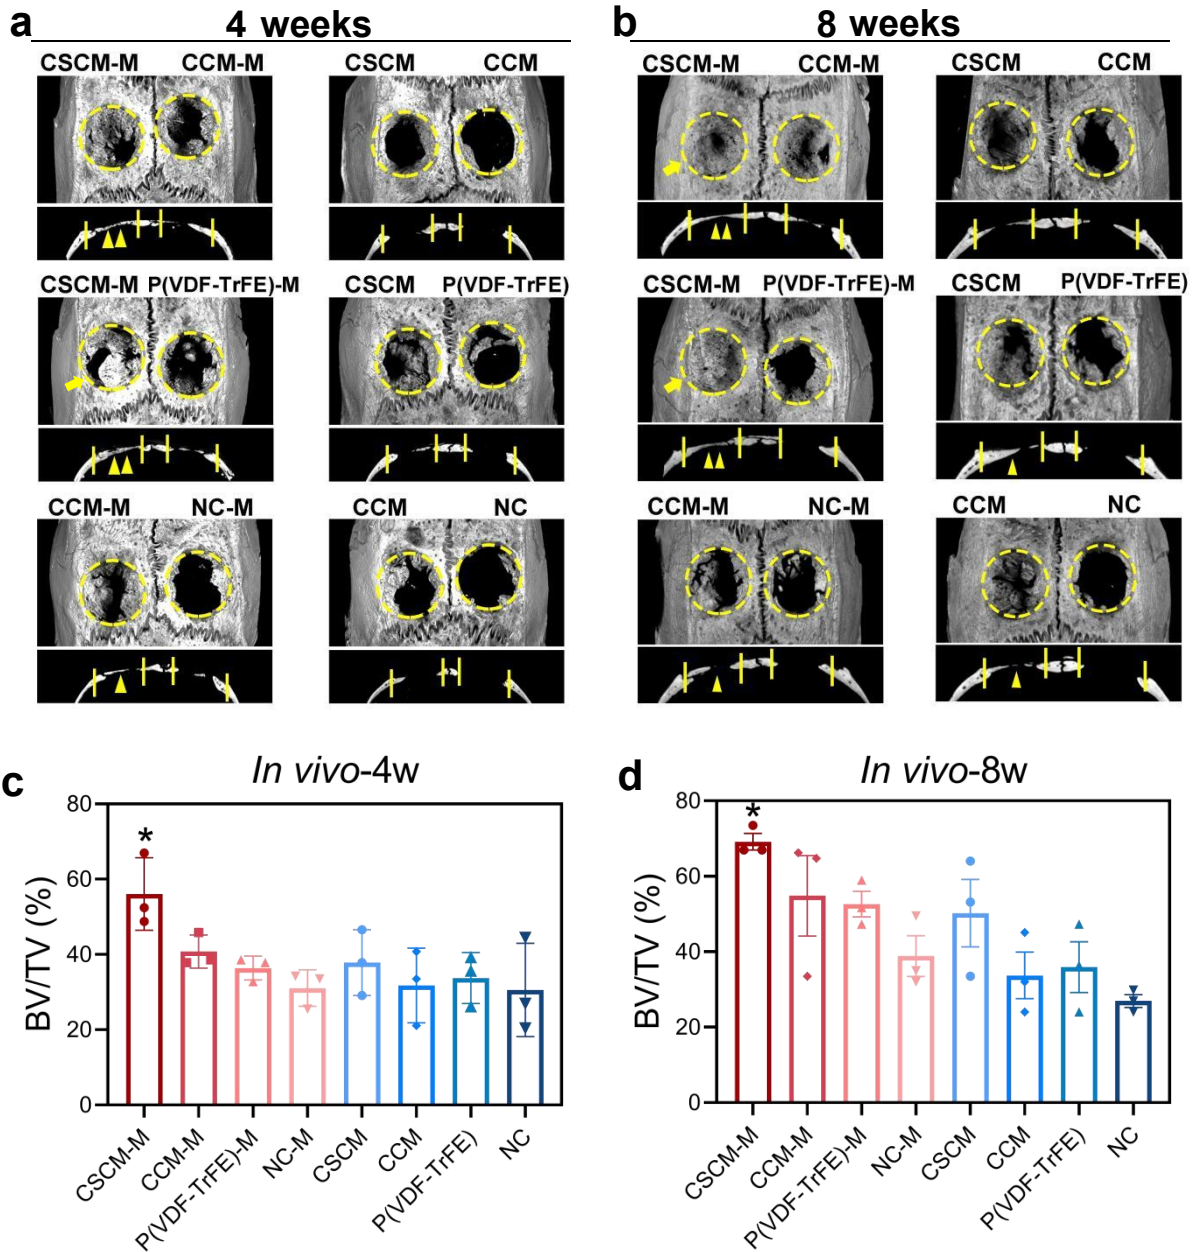

**Supplementary Fig. 11 | Osteogenic properties of core-shell magneto-electric composite membranes *in vivo*.**

**a,b**, Micro-CT images of bone regeneration in rat cranial defects at 4 (**a**) and 8 (**b**) weeks after membrane implantation, showing the most abundant new bone formation in the CSCM-M group. (Yellow arrows indicated enhanced bone regeneration in the CSCM-M group. Yellow triangles denote the new bone. Yellow dotted lines denote the boundary between nascent bone and host bone.) **c,d**, Quantitative statistics of new bone from Micro-CT analysis.  $n=3$  rats for per group and per time point; mean $\pm$ SEM. \* $P<0.05$ , one-way ANOVA. Source data are provided as a Source Data file.

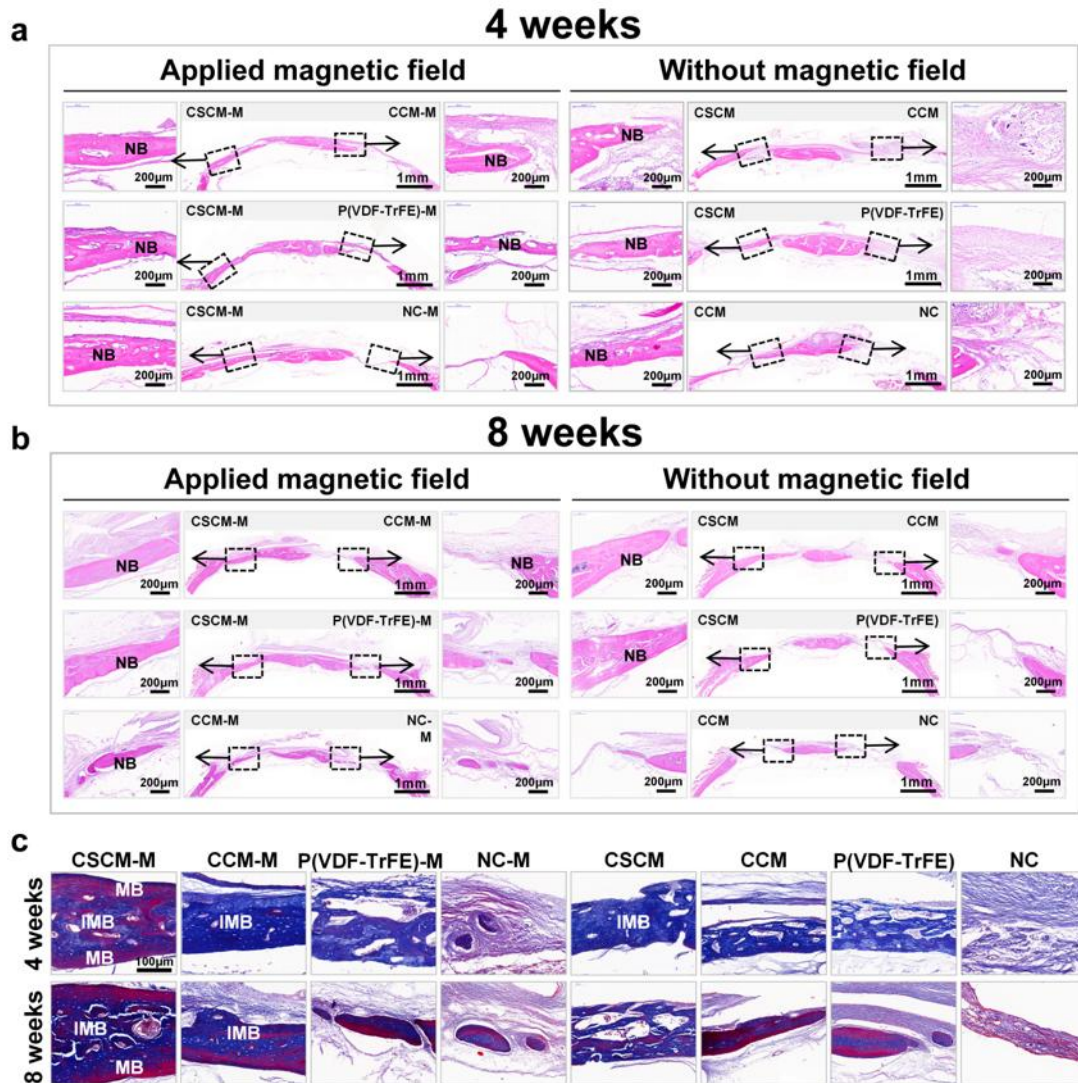

**Supplementary Fig. 12 | Osteogenic properties of core-shell magnetoelectric composite membranes *in vivo***

**a,b**, H&E staining (NB: nascent bone) at 4, 8 weeks after implantation. **c**, Masson's trichrome staining (MB: mature bone; IMB: immature bone). At least three times of experiments were repeated independently.

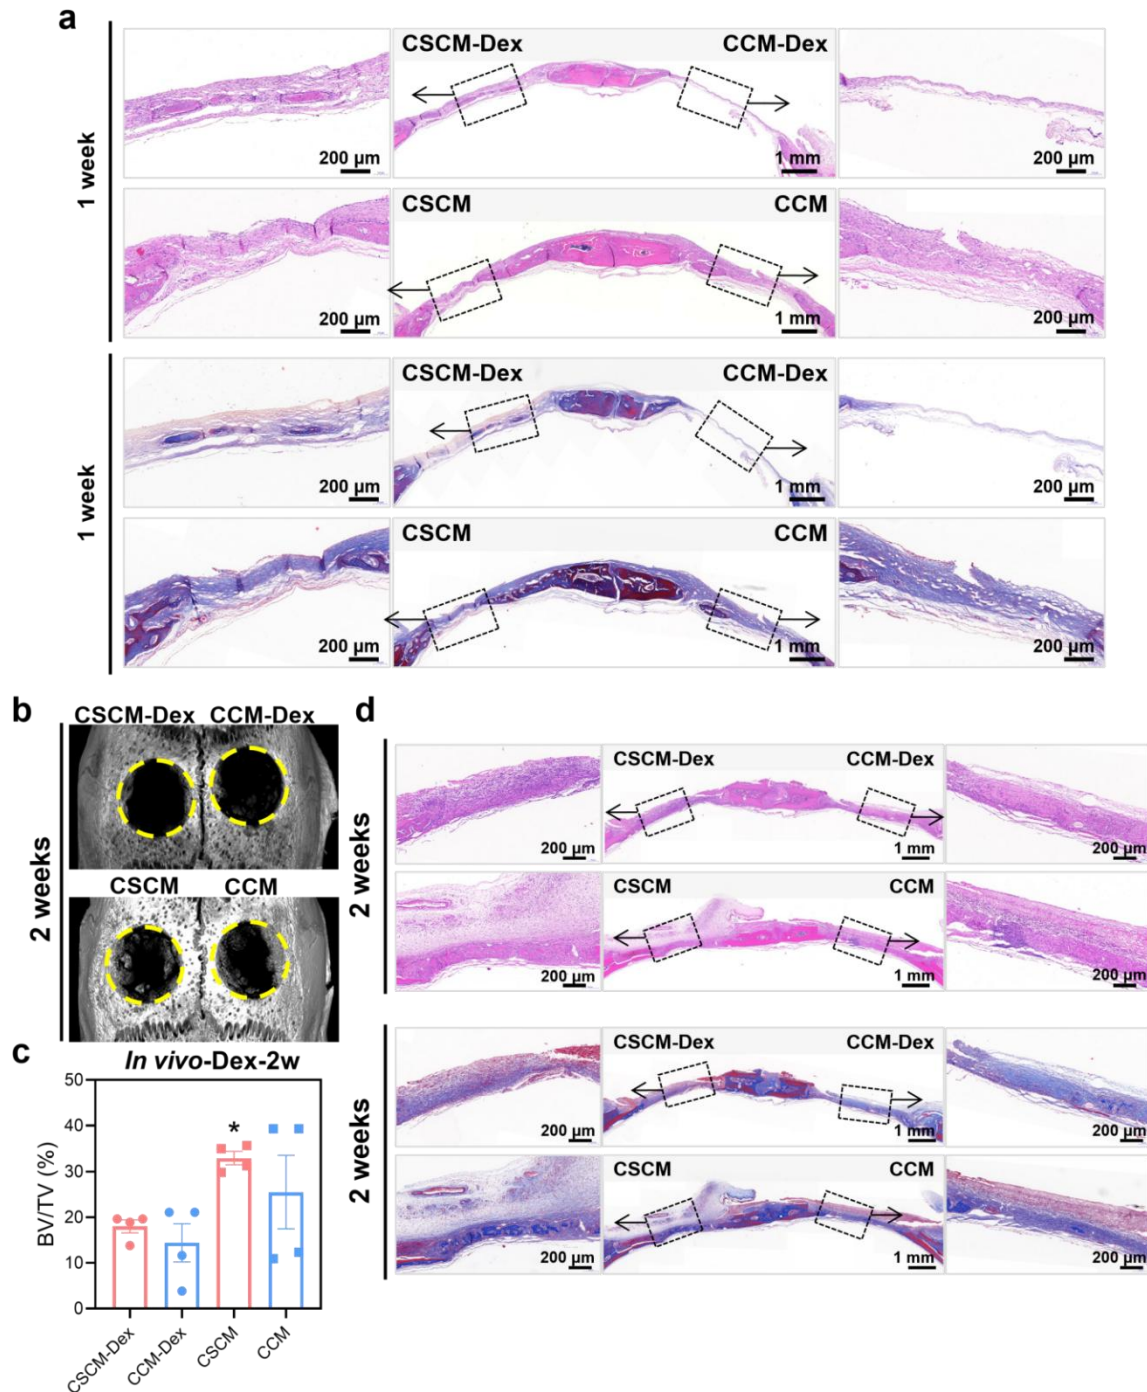

**Supplementary Fig. 13 | Osteogenic inhibition by high dose dexamethasone *in vivo*.**

**a**, H&E staining and Masson's trichrome staining at 1 week, after 3 days implantation and dexamethasone injection. **b**, Micro-CT images of bone regeneration in rat cranial defects at 2 weeks after 3 days of membrane implantation and dexamethasone injection. **c**, Quantitative statistics of new bone from micro-CT analysis.  $n=4$  rats for per group and per time point; mean $\pm$ SEM.\* $P<0.05$ , one-way ANOVA. **d**, H&E staining and Masson's trichrome staining at 1 week after 3 days implantation and dexamethasone injection. At least three times of experiments were repeated independently. Source data are provided as a Source Data file.

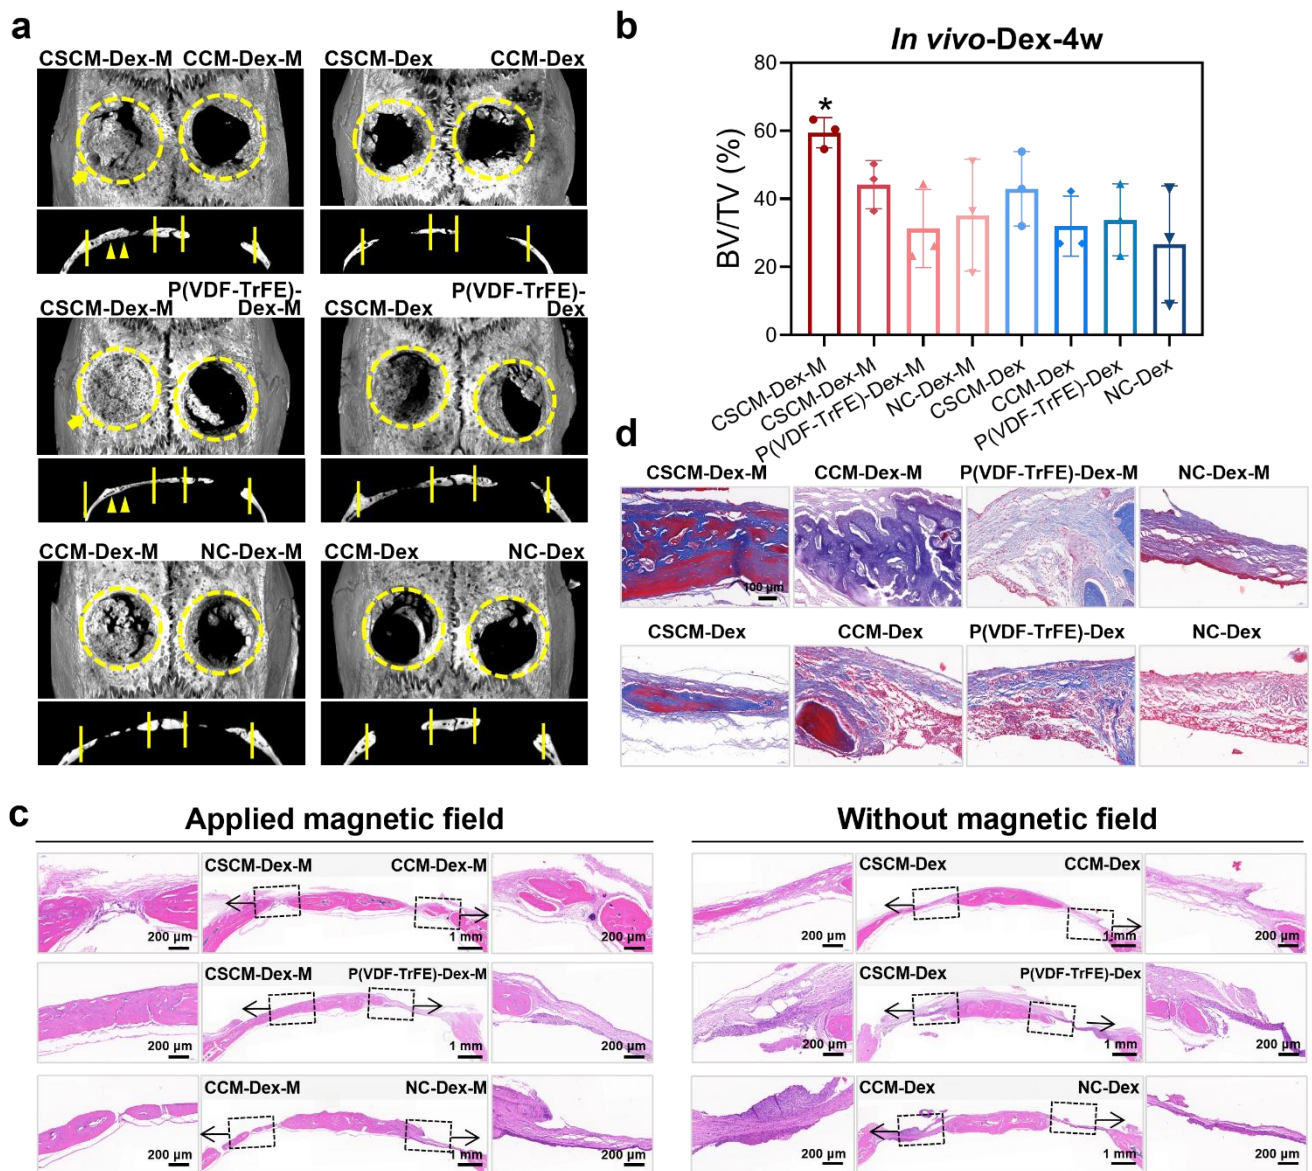

**Supplementary Fig. 14 | The reactivation effect of the implanted core-shell magnetoelectric composite membrane *in vivo* within the rat skull defect model with osteogenesis inhibition.**

**a**, Micro CT images and quantitative statistics (**b**) of bone volume after dexamethasone (Dex) injection to inhibit osteogenesis with and without magnetic treatment (4 weeks).  $n=3$  rats for per group; mean $\pm$ SEM. \* $P<0.05$ , one-way ANOVA.

**c**, H&E staining and Masson's trichrome staining (**d**) of new bone formation after dexamethasone (Dex) injection to inhibit osteogenesis with and without magnetic treatment (4 weeks). Source data are provided as a Source Data file. At least three times of experiments were repeated independently.



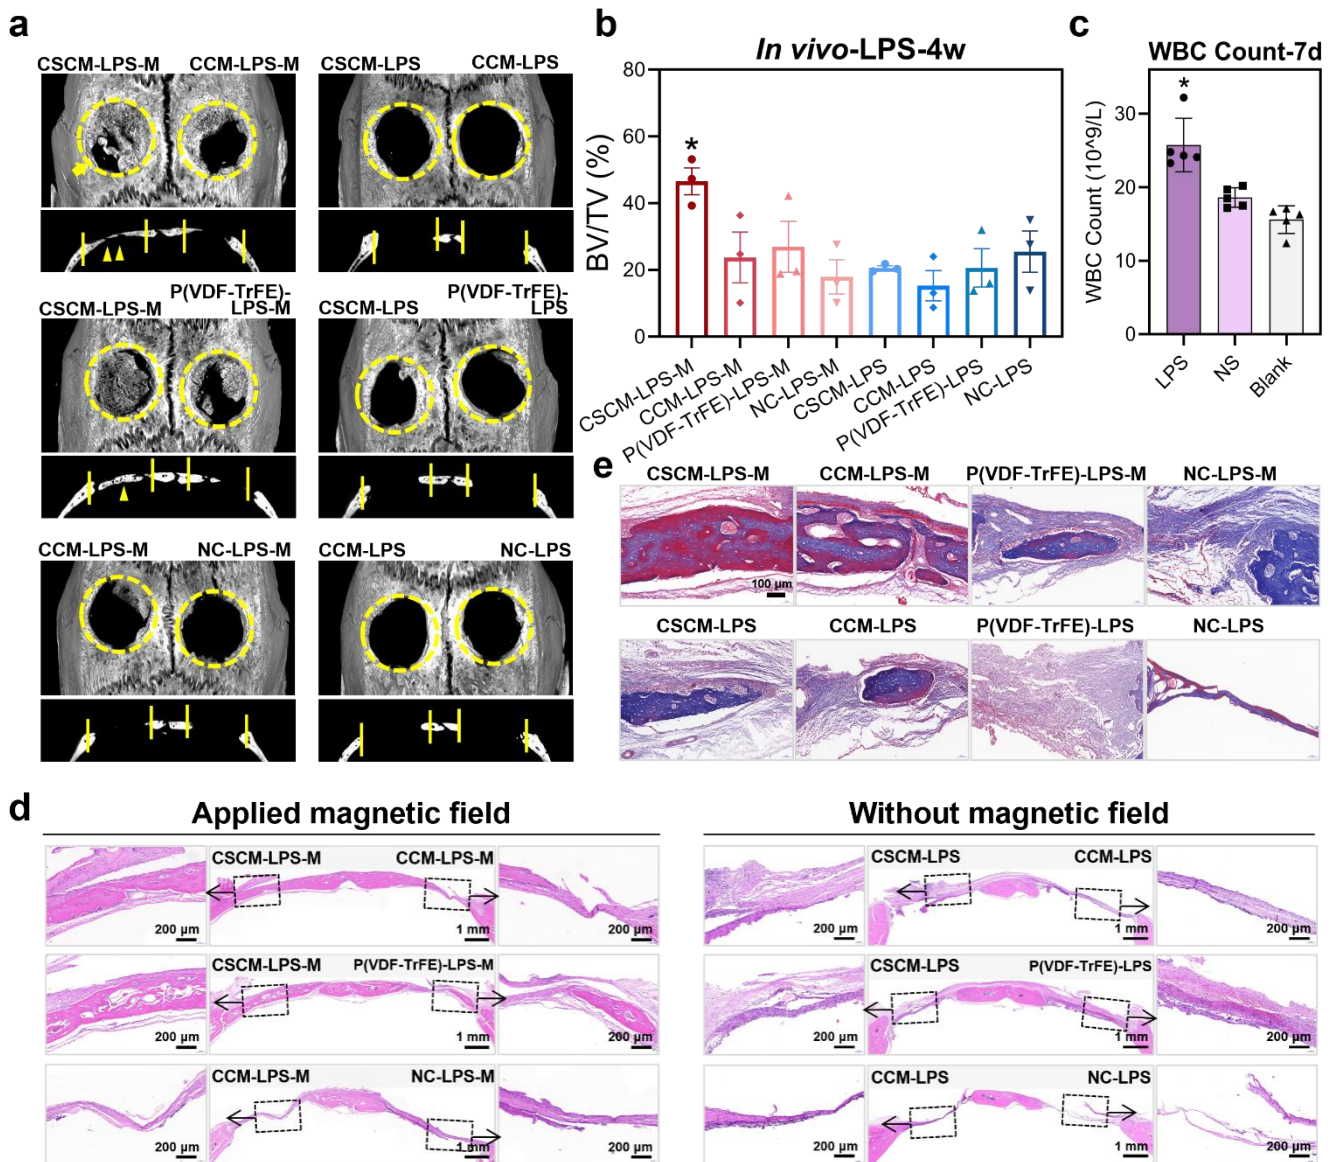

**Supplementary Fig. 15 | The reactivation effect of implanted core-shell magnetolectric composite membrane *in vivo* within the rat skull defect model with LPS-induced systemic inflammation.**

**a**, Micro CT images and quantitative statistics (**b**) of bone volume after LPS injection to induce systemic inflammation with and without magnetic treatment (4 weeks).  $n=3$  rats for per group; mean $\pm$ SEM. \* $P<0.05$ , one-way ANOVA. **c**, White blood cell count at 7 d after membrane implantation. (LPS-1 mg/kg LPS injection, NS-normal saline injection, Blank-without any injection).  $n=5$  rats for per group; mean $\pm$ SEM. \* $P<0.05$ , one-way ANOVA. **d**, H&E staining and Masson's trichrome staining (**e**) of new bone formation after LPS injection to induce systemic inflammation with and without magnetic treatment (4 weeks). Source data are provided as a Source Data file. At least three times of experiments were repeated independently.

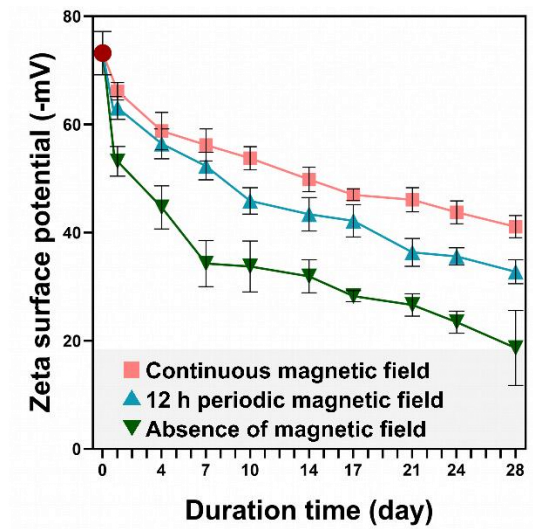

**Supplementary Fig. 16** The surface potentials of the membranes immersed in culture medium decreased over time.  $n=6$  independent membrane samples for per group and per time point; mean $\pm$ SEM. Source data are provided as a Source Data file.

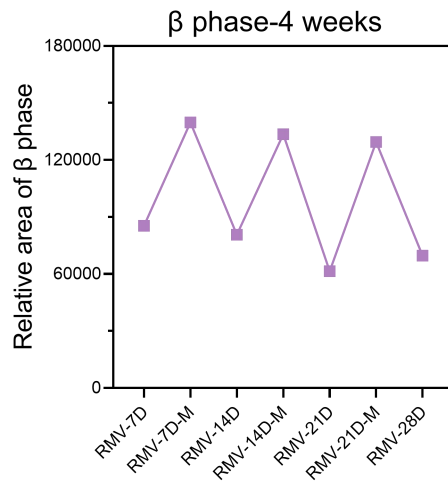

**Supplementary Fig. 17 Relative area of β -phase calculated from XRD.** The β -phase transition was detected from day 7 to day 28 after the magnetic field was removed and 3 cycles were performed. Source data are provided as a Source Data file.

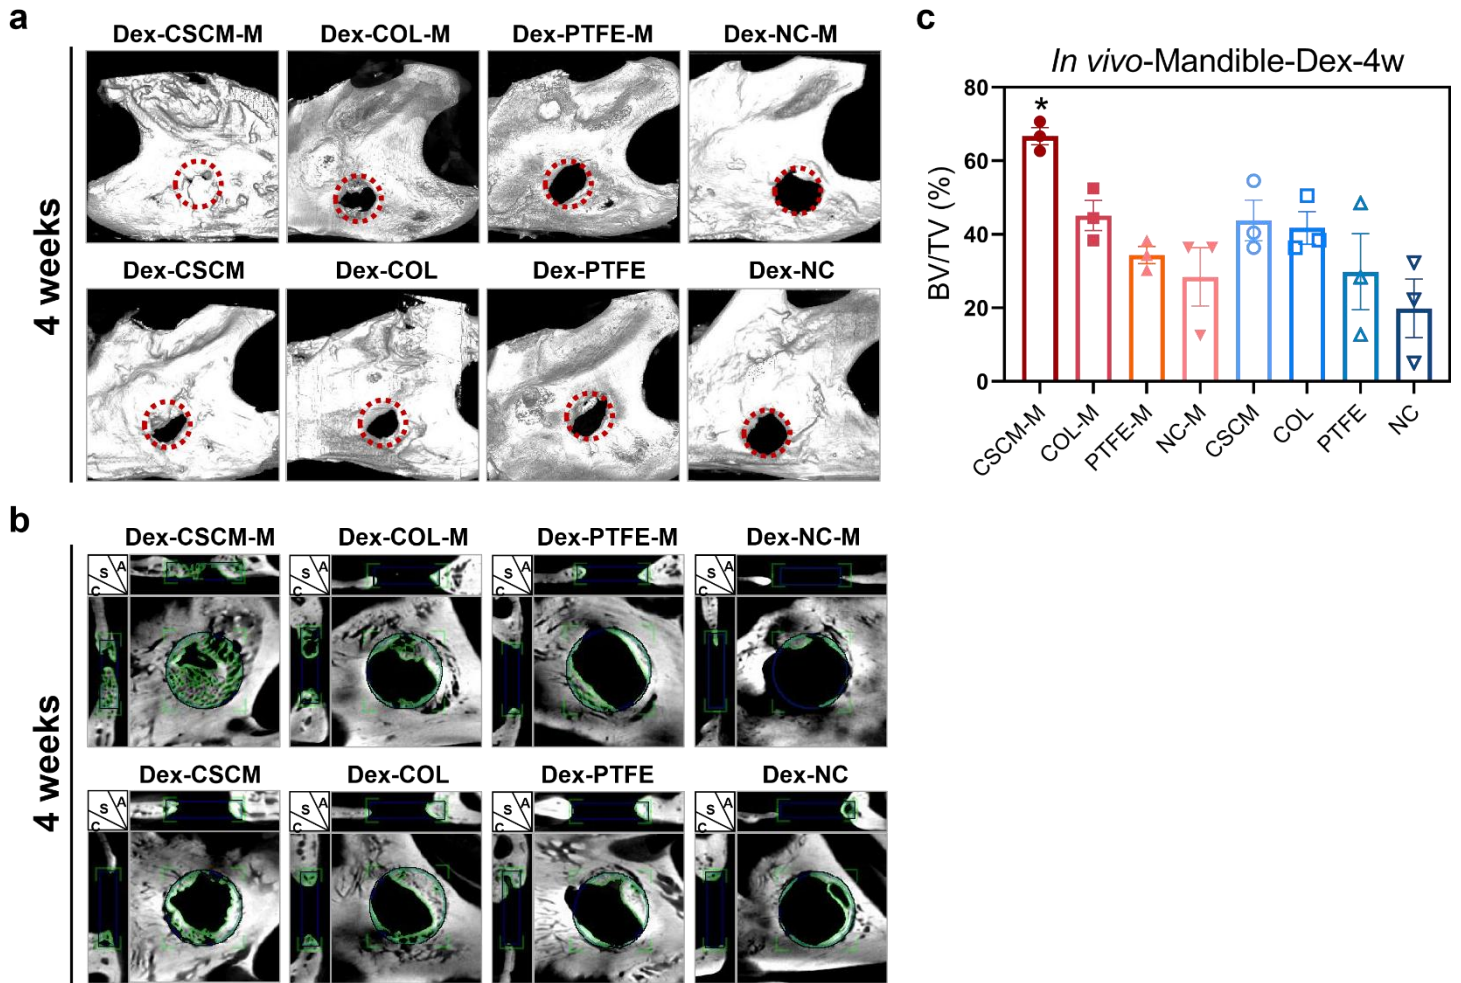

**Supplementary Fig. 18 Comparison of osteogenic effects of CSCM versus commercially-available membranes in promoting bone defect repair.** The model of mandibular critical defect (3 mm) combined with Dex-induced osteogenic inhibition in rats were used in this study. **a**, Three-dimensional micro-CT images at four weeks after material implantation, with and without magnetic field treatment (4 weeks). The bone defect areas are marked by a red dotted circle. **b**, Two-dimensional images of the defect areas at 4 weeks after material implantation and co-morbidity model preparation. The bone defect areas are marked by circles or rectangles. S=Sagittal plane, C=Coronal plane, A=Cross section. **c**, Quantitative statistics of the ratio of new bone volume to total volume (BV/TV).  $n=3$  rats for per group; mean $\pm$ SEM. \* $P<0.05$ , one-way ANOVA. Source data are provided as a Source Data file.

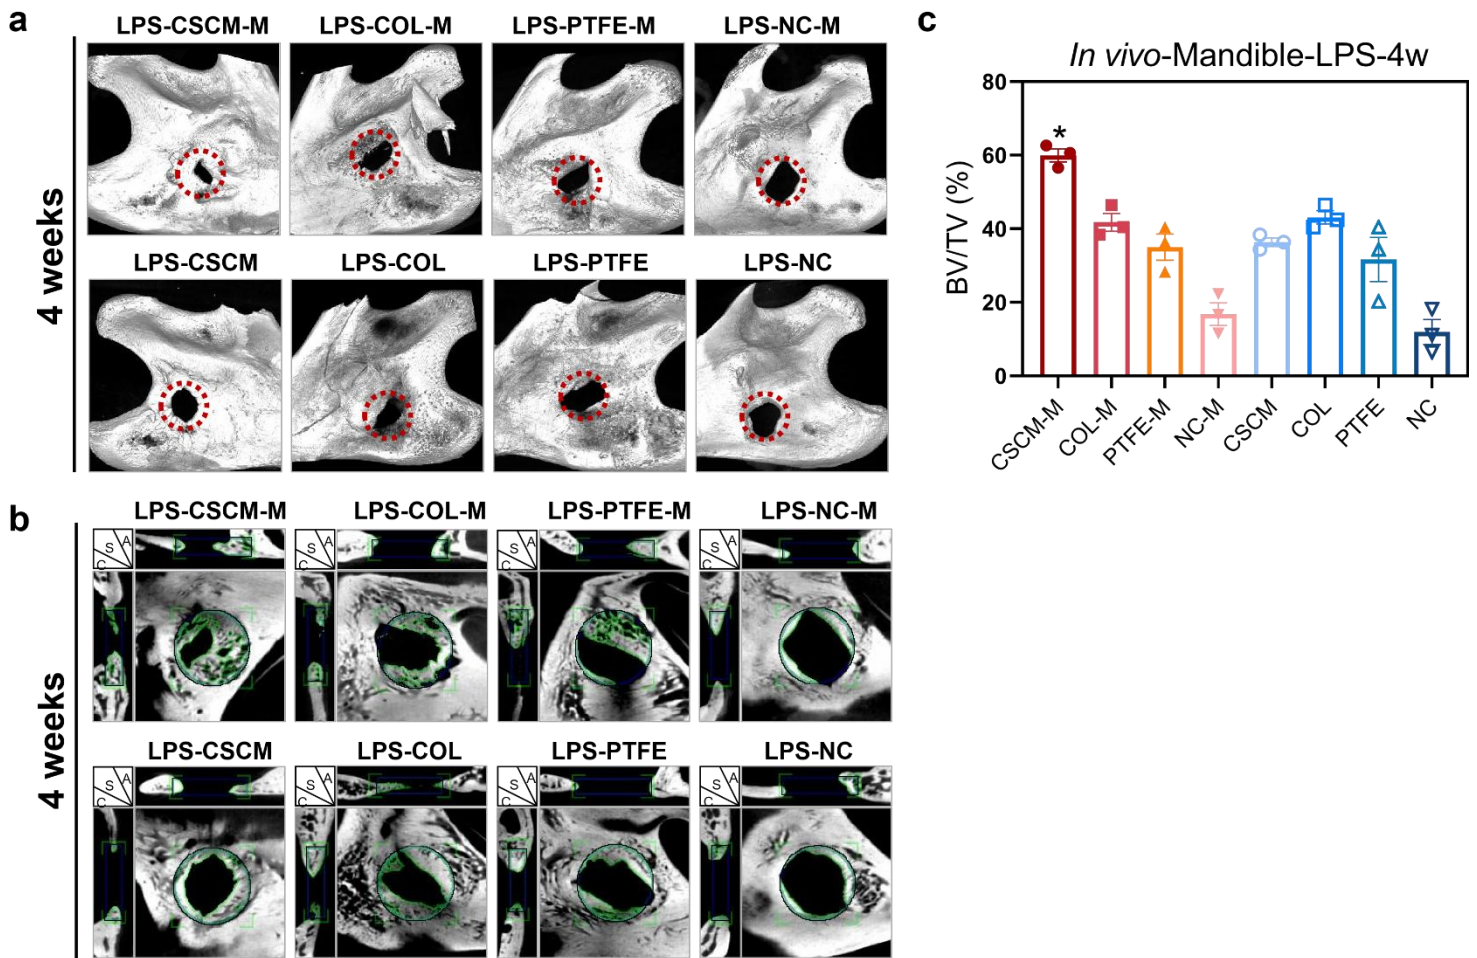

**Supplementary Fig.19 Comparison of osteogenic effects of CSCM versus commercially-available membranes in promoting bone defect repair.** The model of mandibular 3 mm critical defect combined LPS-induced systemic inflammation in rats were used in this study. **a**, Three-dimensional micro-CT images of four weeks after material implantation, with and without magnetic field treatment (4 weeks). The bone defect areas were marked by a red dotted circle. **b**, Two-dimensional images of the defect areas 4 weeks after material implantation and comorbid model preparation. The bone defect areas were marked by circles or rectangles. S=Sagittal plane, C=Coronal plane, A=Cross section. **c**, Quantitative statistics of the ratio of new bone volume to total volume (BV/TV).  $n=3$  rats for per group; mean $\pm$ SEM. \* $P<0.05$ , one-way ANOVA. Source data are provided as a Source Data file.

**Table S1 Osteogenesis efficiency and material morphology of the referenced materials**

| <b>Material name</b>                                 | <b>Morphology</b> | <b>Stimulus type</b> | <b>Data form</b> | <b>Osteogenesis efficiency (%)</b> | <b>References</b> |
|------------------------------------------------------|-------------------|----------------------|------------------|------------------------------------|-------------------|
| BTO NP<br>/P(VDF-TrFE)                               | membrane          | Electroactive        | BV/TV            | 56 (12 w);<br>50 (4 w)             | (1)               |
| BFO+                                                 | membrane          | Electroactive        | BV/TV            | 54 (8 w)                           | (2)               |
| P(VDF-TrFE)                                          | membrane          | Electroactive        | BV/TV            | 52 (8 w)                           | (3)               |
| KNN                                                  | ceramic           | Electroactive        | BV               | 1.2 mm <sup>3</sup>                | (4)               |
| AGCP                                                 | gel               | Electroactive        | BV/TV            | 53 (12 w)                          | (5)               |
| Actuator                                             | scaffold          | Electroactive        | Area             | 40 (4 w)                           | (6)               |
| PVDF-TrFE/BT                                         | scaffold          | Electroactive        | BV/TV            | 20 (4 w)                           | (7)               |
| GO-CMC                                               | scaffold          | Electroactive        | BV/TV            | 30±                                | (8)               |
| nHA/GO/CS+                                           | scaffold          | Photothermal         | BV/TV            | 20 (8 w)                           | (9)               |
| 5BCN@AKT                                             | scaffold          | Photothermal         | BV/TV            | 58.2 (8 w)                         | (10)              |
| GdPO <sub>4</sub> /CS/Fe <sub>3</sub> O <sub>4</sub> | scaffold          | Photothermal         | BV/TV            | 61.23 (12w)                        | (11)              |
| TCP-PDLLA-5LB                                        | scaffold          | Photothermal         | Area             | 35 (8 w)                           | (12)              |
| BP-SrCl <sub>2</sub> /PLGA<br>+Laser                 | microsphere       | Photothermal         | BV/TV            | 38 (8 w)                           | (13)              |
| BPs@PLGA+NIR                                         | membrane          | Photothermal         | BV/TV            | 29.57 (10 w)                       | (14)              |
| ACS+NSD-BMP+<br>US                                   | liposome          | Sonodynamic          | BV/TV            | 20 (4 w)                           | (15)              |
| LIPUS+BaTiO <sub>3</sub> /pTi                        | scaffold          | Sonodynamic          | BV/TV            | 30 (12 w)                          | (16)              |
| $\alpha$ -TCP/CS/Fe <sub>3</sub> O <sub>4</sub> /GO  | cement            | Magnetic             | BV/TV            | 18 (8 w)                           | (17)              |
| AKT-Fe <sub>3</sub> O <sub>4</sub> -CaO <sub>2</sub> | scaffold          | Magnetic             | BV/TV            | 12 (8 w)                           | (18)              |
| BMSC-Fe <sub>3</sub> O <sub>4</sub> -<br>SMF-Exos    | particles         | Magnetic             | BV/TV            | 49 (12 w)                          | (19)              |
| Magnetic scaffold<br>B                               | scaffold          | Magnetic             | Area             | 36.23 (8 w)                        | (20)              |
| Iron oxide core<br>coated with PEI-B                 | particles         | Magnetic             | Healing          | 43 (8 w)                           | (21)              |
| CS/Col/Fe <sub>3</sub> O <sub>4</sub><br>/nHAP       | scaffold          | Magnetic             | BV/TV            | 23 (8 w)                           | (22)              |
| CFO/P(VDF-TrFE)<br>-E/M                              | membrane          | Magneto-<br>electric | BV/TV            | 52.41 (8 w)                        | (23)              |
| CFO@BTO/P(VDF-TrFE)-M                                | membrane          | Magneto-<br>electric | BV/TV            | 69.33 (8 w)                        | Our work          |

**Table S1. Studies using animal experiments to assess *in vivo* osteogenesis efficiency were included.**

Based on a natural bone healing time of 12 weeks, this table only included *in vivo* studies that lasted no longer than 12 weeks to compare the efficiency of biomaterials. All included biomaterials and the results of CSCM-M under both conventional and co-morbidity conditions were concluded in Fig 1a.

**Table S2 Osteogenesis efficiency (%) at 4 weeks post-implantation**

| <b>Group Name</b> | <b>Bone defect</b> | <b>Bone defect with Co-morbidity</b> |
|-------------------|--------------------|--------------------------------------|
| CSCM-M            | 56.05              | 52.08                                |
| CCM-M             | 40.76              | 33.67                                |
| CSCM              | 37.85              | 29.63                                |
| CCM               | 31.78              | 22.99                                |

## Supplementary References

- 1 Zhang, X. *et al.* Nanocomposite Membranes Enhance Bone Regeneration Through Restoring Physiological Electric Microenvironment. *ACS Nano* **10**, 7279-7286, doi:10.1021/acsnano.6b02247 (2016).
- 2 Liu, Y. *et al.* Built-In Electric Fields Dramatically Induce Enhancement of Osseointegration. *Advanced Functional Materials* **27**, doi:10.1002/adfm.201703771 (2017).
- 3 Zhang, C. *et al.* Modulating Surface Potential by Controlling the beta Phase Content in Poly(vinylidene fluoridetrifluoroethylene) Membranes Enhances Bone Regeneration. *Adv Healthc Mater* **7**, e1701466, doi:10.1002/adhm.201701466 (2018).
- 4 Yu, P. *et al.* Bone-Inspired Spatially Specific Piezoelectricity Induces Bone Regeneration. *Theranostics* **7**, 3387-3397, doi:10.7150/thno.19748 (2017).
- 5 Kapat, K. *et al.* Osteochondral Defects Healing Using Extracellular Matrix Mimetic Phosphate/Sulfate Decorated GAGs-Agarose Gel and Quantitative Micro-CT Evaluation. *ACS Biomater Sci Eng* **5**, 149-164, doi:10.1021/acsbiomaterials.8b00253 (2019).
- 6 Reis, J. *et al.* A new piezoelectric actuator induces bone formation *in vivo*: a preliminary study. *J Biomed Biotechnol* **2012**, 613403, doi:10.1155/2012/613403 (2012).
- 7 Freitas, G. P. *et al.* Potential of Osteoblastic Cells Derived from Bone Marrow and Adipose Tissue Associated with a Polymer/Ceramic Composite to Repair Bone Tissue. *Calcif Tissue Int* **101**, 312-320, doi:10.1007/s00223-017-0282-3 (2017).
- 8 Ruan, J. *et al.* Enhanced Physiochemical and Mechanical Performance of Chitosan-Grafted Graphene Oxide for Superior Osteoinductivity. *Advanced Functional Materials* **26**, 1085-1097, doi:10.1002/adfm.201504141 (2016).
- 9 Ma, L. *et al.* A novel photothermally controlled multifunctional scaffold for clinical treatment of osteosarcoma and tissue regeneration. *Materials Today* **36**, 48-62, doi:10.1016/j.mattod.2019.12.005 (2020).
- 10 Zhao, C., Shen, A., Zhang, L., Lin, K. & Wang, X. Borocarbonitrides nanosheets engineered 3D-printed scaffolds for integrated strategy of osteosarcoma therapy and bone regeneration. *Chemical Engineering Journal* **401**, doi:10.1016/j.cej.2020.125989 (2020).
- 11 Zhao, P.-P. *et al.* Ordered arrangement of hydrated GdPO<sub>4</sub> nanorods in magnetic chitosan matrix promotes tumor photothermal therapy and bone regeneration against breast cancer bone metastases. *Chemical Engineering Journal* **381**, doi:10.1016/j.cej.2019.122694 (2020).
- 12 Dang, W. *et al.* LaB6 surface chemistry-reinforced scaffolds for treating bone tumors and bone defects. *Applied Materials Today* **16**, 42-55, doi:10.1016/j.apmt.2019.04.015 (2019).
- 13 Wang, X. *et al.* Near-infrared light-triggered drug delivery system based on black phosphorus for *in vivo* bone regeneration. *Biomaterials* **179**, 164-174, doi:10.1016/j.biomaterials.2018.06.039 (2018).
- 14 Tong, L. *et al.* Near-infrared light control of bone regeneration with biodegradable photothermal osteoimplant. *Biomaterials* **193**, 1-11, doi:10.1016/j.biomaterials.2018.12.008 (2019).
- 15 Crasto, G. J. *et al.* Controlled bone formation using ultrasound-triggered release of BMP-2 from liposomes. *J. Control. Release* **243**, 99-108, doi:10.1016/j.jconrel.2016.09.032 (2016).
- 16 Fan, B. *et al.* Electroactive barium titanate coated titanium scaffold improves osteogenesis and osseointegration with low-intensity pulsed ultrasound for large segmental bone defects.



- Bioactive materials* **5**, 1087-1101, doi:10.1016/j.bioactmat.2020.07.001 (2020).
- 17 Yan, F. *et al.* Biphasic Injectable Bone Cement with Fe<sub>3</sub>O<sub>4</sub>/GO Nanocomposites for the Minimally Invasive Treatment of Tumor-Induced Bone Destruction. *ACS Biomater Sci Eng* **5**, 5833-5843, doi:10.1021/acsbiomaterials.9b00472 (2019).
- 18 Dong, S., Chen, Y., Yu, L., Lin, K. & Wang, X. Magnetic Hyperthermia–Synergistic H<sub>2</sub>O<sub>2</sub> Self-Sufficient Catalytic Suppression of Osteosarcoma with Enhanced Bone-Regeneration Bioactivity by 3D-Printing Composite Scaffolds. *Advanced Functional Materials* **30**, doi:10.1002/adfm.201907071 (2019).
- 19 Wu, D. *et al.* Bone mesenchymal stem cells stimulation by magnetic nanoparticles and a static magnetic field: release of exosomal miR-1260a improves osteogenesis and angiogenesis. *J Nanobiotechnology* **19**, 209, doi:10.1186/s12951-021-00958-6 (2021).
- 20 Panseri, S. *et al.* Modifying bone scaffold architecture *in vivo* with permanent magnets to facilitate fixation of magnetic scaffolds. *Bone* **56**, 432-439, doi:10.1016/j.bone.2013.07.015 (2013).
- 21 Brett, E. *et al.* Magnetic Nanoparticle-Based Upregulation of B-Cell Lymphoma 2 Enhances Bone Regeneration. *Stem Cells Transl Med* **6**, 151-160, doi:10.5966/sctm.2016-0051 (2017).
- 22 Zhao, Y. *et al.* Magnetic bioinspired micro/nanostructured composite scaffold for bone regeneration. *Colloids Surf B Biointerfaces* **174**, 70-79, doi:10.1016/j.colsurfb.2018.11.003 (2019).
- 23 Liu, W. *et al.* Remote Tuning of Built - In Magnetolectric Microenvironment to Promote Bone Regeneration by Modulating Cellular Exposure to Arginylglycylaspartic Acid Peptide. *Advanced Functional Materials* **31**, 2006226, doi:10.1002/adfm.202006226 (2020).
